# Supplementary material
Source: PubMed Central journal article supplement (PMC4809797)
Supplement: NIHMS716606-supplement-3.pdf [file NIHMS716606-supplement-3.pdf]

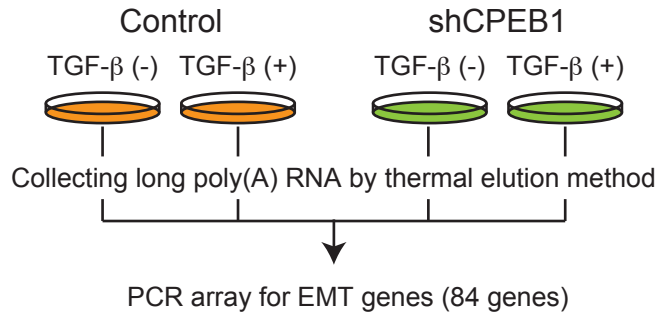

Poly(A) length in shCPEB1 with TGF- $\beta$  compared to control with TGF- $\beta$

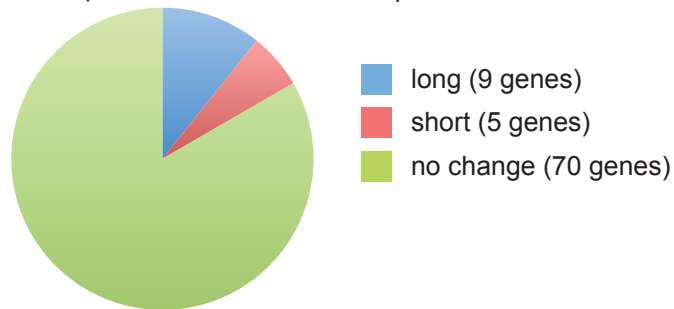

| Long poly(A)                                                       | Short poly(A)                                       |
|--------------------------------------------------------------------|-----------------------------------------------------|
| Bone morphogenetic protein 7 (Bmp7)                                | Collagen, type III, alpha 1 (Col3a1)                |
| Insulin-like growth factor binding protein 4 (Igfbp4)              | Fibroblast growth factor binding protein 1 (Fgfbp1) |
| Keratin 7 (Krt7)                                                   | Matrix metalloproteinase 2 (Mmp2)                   |
| Matrix metalloproteinase 9 (Mmp9)                                  | Matrix metalloproteinase 3 (Mmp3)                   |
| Macrophage stimulating 1 receptor (Mst1r)                          | Regulator of G-protein signaling 2 (Rgs2)           |
| Platelet derived growth factor receptor, beta polypeptide (Pdgfrb) |                                                     |
| Serine peptidase inhibitor, clade E, member 1 (Serpine1)           |                                                     |
| Snail homologue 3 (Snail3)                                         |                                                     |
| Wingless-related MMTV integration site 11 (Wnt11)                  |                                                     |
