# Supplementary material
Source: PubMed Central journal article supplement (PMC4809797)
Supplement: NIHMS716606-supplement-5.pdf [file NIHMS716606-supplement-5.pdf]

Table S1. Nucleotide sequences of the primers used for real-time PCR

| Gene       | Forward                      | Reverse                     |
|------------|------------------------------|-----------------------------|
| CPEB1      | 5' -CACAGATAAGCACAAAGTATC-3' | 5' -GACACAGAGAATCTTCTAG-3'  |
| ZO1        | 5' -GGGAGGGTCAAATGAAGACA-3'  | 5' -CACAGCGAAATGATGGAAGA-3' |
| E-cadherin | 5' -CAAGGACAGCCTTCTTTTCG-3'  | 5' -TGGACTTCAGCGTCACTTTG-3' |
| Myc        | 5' -GCCCAGTGAGGATATCTGGA-3'  | 5' -ATCGCAGATGAAGCTCTGGT-3' |
| EGFP       | 5' -ACGTAAACGGCCACAAGTTC-3'  | 5' -AAGTCGTGCTGCTTCATGTG-3' |
| MMP9       | 5' -TGAATCAGCTGGCTTTTGTG-3'  | 5' -GTGGATAGCTCGGTGGTGT-3'  |
| Tubulin    | 5' -GCTGACCAGTGCACGGGT-3'    | 5' -AAACCTGGGGGGCTGGGT-3'   |
