# Supplementary material
Source: PubMed Central journal article supplement (PMC4809797)

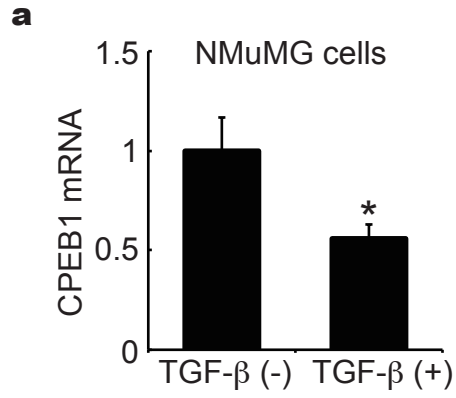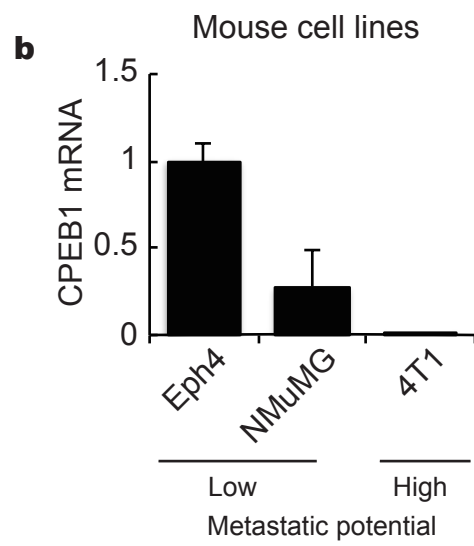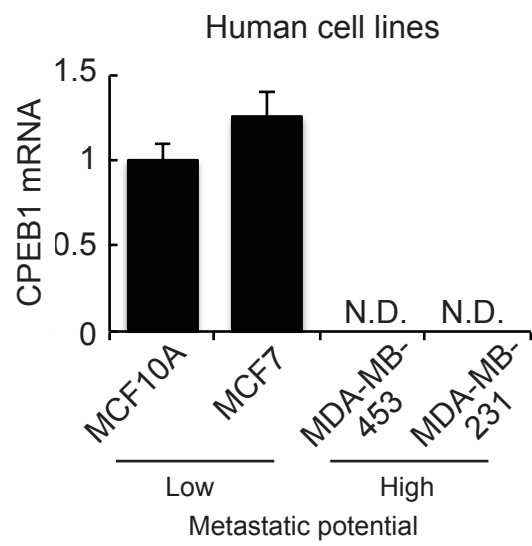

Supplement: NIHMS716606-supplement-1.pdf [file NIHMS716606-supplement-1.pdf]

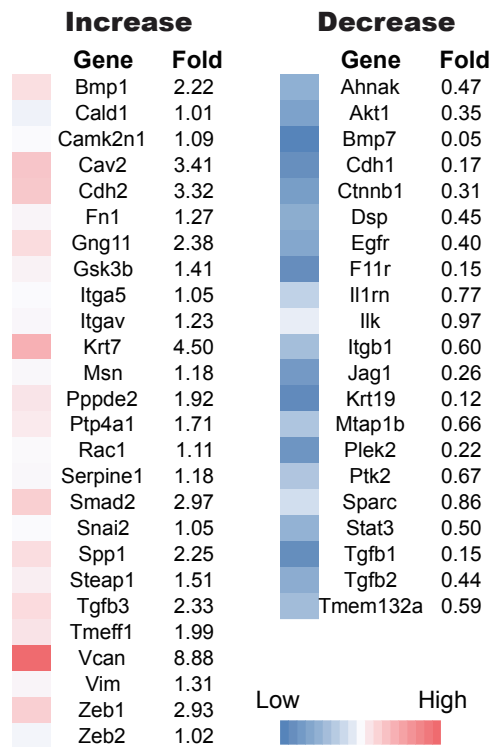

Supplement: NIHMS716606-supplement-2.pdf [file NIHMS716606-supplement-2.pdf]

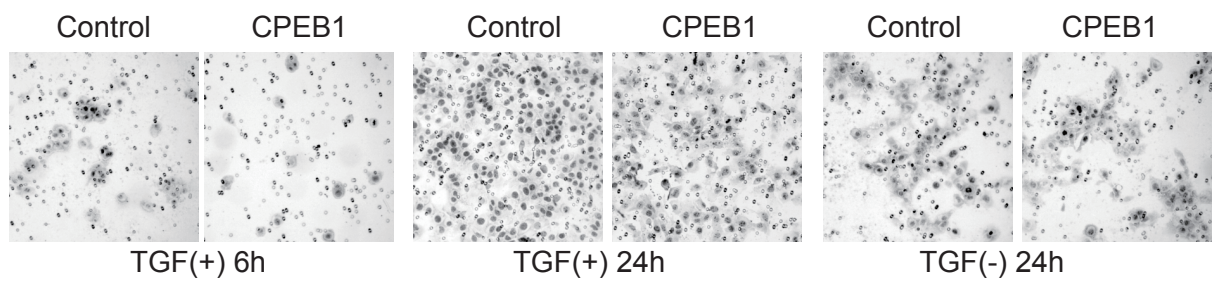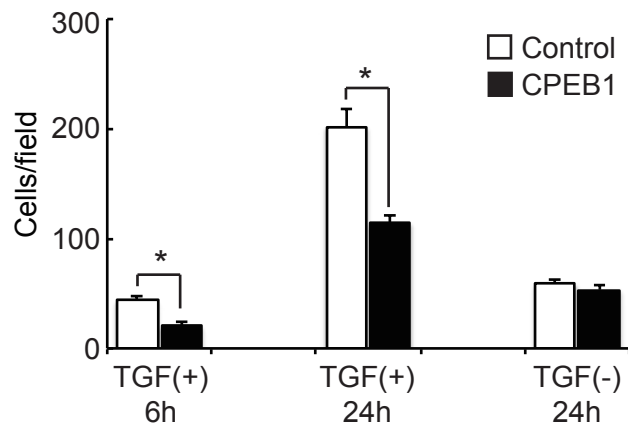

Supplement: NIHMS716606-supplement-4.pdf [file NIHMS716606-supplement-4.pdf]
